# Supplementary material
Source: publisher figshare collection journal article supplement (https://acs.figshare.com/ndownloader/files/3948022)
Supplement: Supplementary file 1 [file 3948022]

#==============================================================================

data__compound3a

#==============================================================================

# CHEMICAL DATA

_chemical_formula_sum                  'C10 H21 N2 O0.50 '
_chemical_formula_moiety               'C10 H21 N2 O0.50 '
_chemical_formula_weight               177.29
_chemical_melting_point                ?

#==============================================================================

# CRYSTAL DATA
_symmetry_cell_setting                 monoclinic
_symmetry_space_group_name_H-M        'C 1 2/c 1'
_symmetry_space_group_name_Hall       '-C 2yc'
_symmetry_Int_Tables_number            15
loop_
_symmetry_equiv_pos_site_id
_symmetry_equiv_pos_as_xyz
1   '+X,+Y,+Z'
2   '-X,+Y,1/2-Z'
3   '-X,-Y,-Z'
4   '+X,-Y,1/2+Z'
5   '1/2+X,1/2+Y,+Z'
6   '1/2-X,1/2+Y,1/2-Z'
7   '1/2-X,1/2-Y,-Z'
8   '1/2+X,1/2-Y,1/2+Z'

#------------------------------------------------------------------------------

_cell_length_a                         22.675(3)
_cell_length_b                         6.1256(9)
_cell_length_c                         16.5599(18)
_cell_angle_alpha                      90.0000
_cell_angle_beta                       113.194(3)
_cell_angle_gamma                      90.0000
_cell_volume                           2114.3(5)
_cell_formula_units_Z                  8
_cell_measurement_reflns_used          7397
_cell_measurement_theta_min            3.5
_cell_measurement_theta_max            27.4
_cell_measurement_temperature          173.1

#------------------------------------------------------------------------------

_exptl_crystal_description            'needle'
_exptl_crystal_colour                 'colorless'
_exptl_crystal_size_max                0.75
_exptl_crystal_size_mid                0.10
_exptl_crystal_size_min                0.02
_exptl_crystal_density_diffrn          1.114
_exptl_crystal_density_meas            ?
_exptl_crystal_density_method         'not measured'
_exptl_crystal_F_000                   792.00
_exptl_absorpt_coefficient_mu          0.069
_exptl_absorpt_correction_type         multi-scan
_exptl_absorpt_process_details         
;
    Higashi, T. (1995). Program for Absorption Correction.
    Rigaku Corporation, Tokyo, Japan.
;
_exptl_absorpt_correction_T_min        0.007
_exptl_absorpt_correction_T_max        0.999

#==============================================================================

# EXPERIMENTAL DATA

_diffrn_ambient_temperature            173.1
_diffrn_radiation_type                'Mo K\a'
_diffrn_radiation_wavelength           0.71075
_diffrn_measurement_device_type       'Rigaku RAXIS-RAPID'
_diffrn_measurement_method             \w
_diffrn_detector_area_resol_mean       10.00
_diffrn_reflns_number                  8937
_diffrn_reflns_av_R_equivalents        0.087
_diffrn_reflns_theta_max               27.45
_diffrn_measured_fraction_theta_max    0.991
_diffrn_reflns_theta_full              27.45
_diffrn_measured_fraction_theta_full   0.991
_diffrn_reflns_limit_h_min             -29
_diffrn_reflns_limit_h_max             29
_diffrn_reflns_limit_k_min             -7
_diffrn_reflns_limit_k_max             7
_diffrn_reflns_limit_l_min             -21
_diffrn_reflns_limit_l_max             20

#==============================================================================

# REFINEMENT DATA

_refine_special_details
;
    Refinement was performed using reflections with F^2^ > 2.0 sigma(F^2^).
    The weighted R-factor(wR), goodness of fit (S) and R-factor (gt) are 
    based on F, with F set to zero for negative F. The threshold expression of
    F^2^ > 2.0 sigma(F^2^) is used only for calculating R-factor (gt).
;
_reflns_number_total                   2388
_reflns_number_gt                      1293
_reflns_threshold_expression           F^2^>2.0\s(F^2^)
_refine_ls_structure_factor_coef       F
_refine_ls_R_factor_gt                 0.0563
_refine_ls_wR_factor_ref               0.0660
_refine_ls_hydrogen_treatment          refU
_refine_ls_number_reflns               1311
_refine_ls_number_parameters           135
_refine_ls_goodness_of_fit_ref         1.007
_refine_ls_weighting_scheme            calc
_refine_ls_weighting_details
'w = 1/[0.0020Fo^2^ + 1.0000\s(Fo^2^)]'
_refine_ls_shift/su_max                0.0000
_refine_diff_density_max               0.36
_refine_diff_density_min               -0.26
_refine_ls_extinction_method           none
_refine_ls_extinction_coef             ?

loop_
_atom_type_symbol
_atom_type_description
_atom_type_scat_dispersion_real
_atom_type_scat_dispersion_imag
_atom_type_scat_source
  'C' 'C'  0.003 0.002 
;
International Tables for Crystallography
(1992, Vol. C, Tables 4.2.6.8 and 6.1.1.4)
;
  'H' 'H'  0.000 0.000 
;
International Tables for Crystallography
(1992, Vol. C, Table 6.1.1.4)
;
  'N' 'N'  0.006 0.003 
;
International Tables for Crystallography
(1992, Vol. C, Tables 4.2.6.8 and 6.1.1.4)
;
  'O' 'O'  0.011 0.006 
;
International Tables for Crystallography
(1992, Vol. C, Tables 4.2.6.8 and 6.1.1.4)
;

#==============================================================================

# ATOMIC COORDINATES AND THERMAL PARAMETERS

loop_
_atom_site_label
_atom_site_type_symbol
_atom_site_fract_x
_atom_site_fract_y
_atom_site_fract_z
_atom_site_U_iso_or_equiv
_atom_site_adp_type
_atom_site_occupancy
_atom_site_symmetry_multiplicity
_atom_site_calc_flag
_atom_site_refinement_flags
_atom_site_disorder_assembly
_atom_site_disorder_group
 O(1) O 1.0000 0.0864(4) 0.7500 0.0397(7) Uani 1.00 2 d S . .
 N(1) N 0.86944(9) 0.2795(3) 0.69757(12) 0.0227(5) Uani 1.00 1 d . . .
 N(2) N 0.87855(9) -0.1975(3) 0.75204(13) 0.0241(5) Uani 1.00 1 d . . .
 C(1) C 0.84548(11) 0.2726(4) 0.60070(15) 0.0267(6) Uani 1.00 1 d . . .
 C(2) C 0.83971(11) 0.0337(4) 0.57103(15) 0.0284(6) Uani 1.00 1 d . . .
 C(3) C 0.79730(11) -0.0972(4) 0.60560(15) 0.0290(6) Uani 1.00 1 d . . .
 C(4) C 0.81910(10) -0.0735(4) 0.70492(15) 0.0246(6) Uani 1.00 1 d . . .
 C(5) C 0.82516(10) 0.1704(3) 0.73013(15) 0.0239(6) Uani 1.00 1 d . . .
 C(6) C 0.84727(12) 0.1941(4) 0.82968(16) 0.0283(6) Uani 1.00 1 d . . .
 C(7) C 0.90809(11) 0.0615(4) 0.87932(15) 0.0277(6) Uani 1.00 1 d . . .
 C(8) C 0.90056(11) -0.1765(4) 0.84844(16) 0.0278(6) Uani 1.00 1 d . . .
 C(9) C 0.88950(12) 0.4031(4) 0.56958(17) 0.0350(7) Uani 1.00 1 d . . .
 C(10) C 0.96300(12) -0.3026(4) 0.89170(17) 0.0372(7) Uani 1.00 1 d . . .
 H(1) H 0.8028 0.3302 0.5725 0.025 Uiso 1.00 1 c R . .
 H(2) H 0.8216 0.0241 0.5084 0.021 Uiso 1.00 1 c R . .
 H(3) H 0.8848 -0.0295 0.5911 0.033 Uiso 1.00 1 c R . .
 H(4) H 0.7540 -0.0449 0.5767 0.028 Uiso 1.00 1 c R . .
 H(5) H 0.7956 -0.2545 0.5904 0.035 Uiso 1.00 1 c R . .
 H(6) H 0.7869 -0.1341 0.7220 0.029 Uiso 1.00 1 c R . .
 H(7) H 0.7829 0.2301 0.7014 0.018 Uiso 1.00 1 c R . .
 H(8) H 0.8532 0.3488 0.8445 0.029 Uiso 1.00 1 c R . .
 H(9) H 0.8116 0.1409 0.8465 0.038 Uiso 1.00 1 c R . .
 H(10) H 0.9468 0.1265 0.8726 0.027 Uiso 1.00 1 c R . .
 H(11) H 0.9171 0.0648 0.9414 0.021 Uiso 1.00 1 c R . .
 H(12) H 0.8670 -0.2415 0.8641 0.031 Uiso 1.00 1 c R . .
 H(13) H 0.8968 0.5530 0.5946 0.047 Uiso 1.00 1 c R . .
 H(14) H 0.8704 0.4118 0.5063 0.053 Uiso 1.00 1 c R . .
 H(15) H 0.9301 0.3348 0.5902 0.038 Uiso 1.00 1 c R . .
 H(16) H 0.9579 -0.4614 0.8731 0.044 Uiso 1.00 1 c R . .
 H(17) H 0.9791 -0.2981 0.9557 0.043 Uiso 1.00 1 c R . .
 H(18) H 0.9985 -0.2306 0.8778 0.045 Uiso 1.00 1 c R . .
 H(19) H 0.8741 0.4225 0.7134 0.044 Uiso 1.00 1 c R . .
 H(20) H 0.9090 -0.1472 0.7386 0.022 Uiso 1.00 1 c R . .
 H(21) H 1.0354 0.1720 0.7629 0.078 Uiso 1.00 1 c R . .


loop_
_atom_site_aniso_label
_atom_site_aniso_U_11
_atom_site_aniso_U_22
_atom_site_aniso_U_33
_atom_site_aniso_U_12
_atom_site_aniso_U_13
_atom_site_aniso_U_23
 O(1) 0.0279(13) 0.0329(15) 0.0610(18) 0.0000 0.0206(12) 0.0000
 N(1) 0.0277(10) 0.0195(10) 0.0220(10) -0.0007(8) 0.0110(8) -0.0013(8)
 N(2) 0.0255(10) 0.0237(10) 0.0234(10) -0.0003(8) 0.0099(8) 0.0015(8)
 C(1) 0.0274(11) 0.0264(13) 0.0263(13) 0.0030(10) 0.0105(10) 0.0035(10)
 C(2) 0.0322(12) 0.0331(15) 0.0198(12) -0.0003(11) 0.0101(10) -0.0036(10)
 C(3) 0.0279(12) 0.0281(13) 0.0256(13) -0.0030(10) 0.0046(10) -0.0027(11)
 C(4) 0.0203(10) 0.0266(13) 0.0278(13) -0.0040(10) 0.0104(9) 0.0011(10)
 C(5) 0.0215(11) 0.0247(13) 0.0275(12) 0.0032(9) 0.0118(9) 0.0007(10)
 C(6) 0.0352(13) 0.0285(13) 0.0271(13) 0.0008(11) 0.0186(11) -0.0022(11)
 C(7) 0.0312(12) 0.0327(14) 0.0208(12) -0.0011(11) 0.0119(10) -0.0011(10)
 C(8) 0.0258(11) 0.0279(14) 0.0278(13) -0.0020(10) 0.0086(10) 0.0038(10)
 C(9) 0.0402(15) 0.0341(16) 0.0352(15) -0.0017(12) 0.0195(12) 0.0043(12)
 C(10) 0.0360(14) 0.0331(15) 0.0330(15) 0.0022(12) 0.0035(11) 0.0054(12)

#==============================================================================

_computing_data_collection            'PROCESS-AUTO'
_computing_cell_refinement            'PROCESS-AUTO'
_computing_data_reduction             'CrystalStructure'
_computing_structure_solution         'SIR92'
_computing_structure_refinement       'CRYSTALS'
_computing_publication_material       'CrystalStructure 3.8'
_computing_molecular_graphics          ?

#==============================================================================

# MOLECULAR GEOMETRY

_geom_special_details
;
    ENTER SPECIAL DETAILS OF THE MOLECULAR GEOMETRY
;

loop_
_geom_bond_atom_site_label_1
_geom_bond_atom_site_label_2
_geom_bond_distance
_geom_bond_publ_flag
_geom_bond_site_symmetry_1
_geom_bond_site_symmetry_2
N(1) C(1) 1.478(3) yes . .
N(1) C(5) 1.474(3) yes . .
N(2) C(4) 1.475(2) yes . .
N(2) C(8) 1.479(3) yes . .
C(1) C(2) 1.532(3) yes . .
C(1) C(9) 1.519(4) yes . .
C(2) C(3) 1.526(3) yes . .
C(3) C(4) 1.526(3) yes . .
C(4) C(5) 1.543(3) yes . .
C(5) C(6) 1.529(3) yes . .
C(6) C(7) 1.531(3) yes . .
C(7) C(8) 1.532(3) yes . .
C(8) C(10) 1.522(3) yes . .

loop_
_geom_angle_atom_site_label_1
_geom_angle_atom_site_label_2
_geom_angle_atom_site_label_3
_geom_angle
_geom_angle_publ_flag
_geom_angle_site_symmetry_1
_geom_angle_site_symmetry_2
_geom_angle_site_symmetry_3
C(1) N(1) C(5) 111.84(16) yes . . .
C(4) N(2) C(8) 112.1(2) yes . . .
N(1) C(1) C(2) 108.90(18) yes . . .
N(1) C(1) C(9) 110.09(17) yes . . .
C(2) C(1) C(9) 112.2(2) yes . . .
C(1) C(2) C(3) 111.6(2) yes . . .
C(2) C(3) C(4) 111.70(18) yes . . .
N(2) C(4) C(3) 111.2(2) yes . . .
N(2) C(4) C(5) 112.97(16) yes . . .
C(3) C(4) C(5) 109.9(2) yes . . .
N(1) C(5) C(4) 109.9(2) yes . . .
N(1) C(5) C(6) 111.73(17) yes . . .
C(4) C(5) C(6) 109.86(19) yes . . .
C(5) C(6) C(7) 111.8(2) yes . . .
C(6) C(7) C(8) 111.54(17) yes . . .
N(2) C(8) C(7) 112.90(19) yes . . .
N(2) C(8) C(10) 108.7(2) yes . . .
C(7) C(8) C(10) 111.41(18) yes . . .


#==============================================================================

# Additional structures and associated data_? identifiers
# should be added at this point if there is more than one 
# structure analysis in the CIF.

#==============================================================================

#     End of CIF

#==============================================================================
